# Supplementary material for: El reconocimiento expreso como inquilino del ocupante de vivienda sin contrato de inquilinato.
Source: Royal Society of Chemistry journal article supplement (doi:10.1039/c9ra10163b), 1950-01-01
Supplement: c9ra10163b1.pdf [file c9ra10163b1.pdf]

## Supporting Information

### **Synthesis, structure, and electronic properties of $\text{Li}_{11}\text{RbGd}_4\text{Te}_6\text{O}_{30}$ single crystal**

Zhi-An Zhu<sup>1</sup>, Yu-Cong He,<sup>1</sup> Yang-Yang Lv,<sup>2,3</sup> Jianghe Feng<sup>4\*</sup>, Jian Zhou<sup>1,3,5\*</sup>

<sup>1</sup>National Laboratory of Solid State Microstructures & Department of Materials Science and Engineering,

Nanjing University, Nanjing, 210093 China

<sup>2</sup>National Laboratory of Solid State Microstructures & Department of Physics, Nanjing University, Nanjing,

210093 China

<sup>3</sup>Collaborative Innovation Center of Advanced Microstructure, Nanjing University, Nanjing, 210093 China

<sup>4</sup> State Key Laboratory of Structural Chemistry, Fujian Institute of Research on the Structure of Matter,

Chinese Academy of Sciences, Fuzhou 350002, China

<sup>5</sup>Jiangsu Key Laboratory of Artificial Functional Materials, Nanjing University, Nanjing, 210093 China

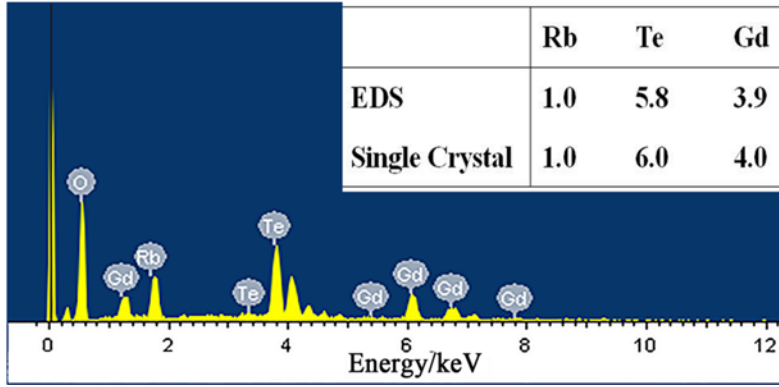

**Fig. S1.** EDS result for  $\text{Li}_{11}\text{RbGd}_4\text{Te}_6\text{O}_{30}$ .

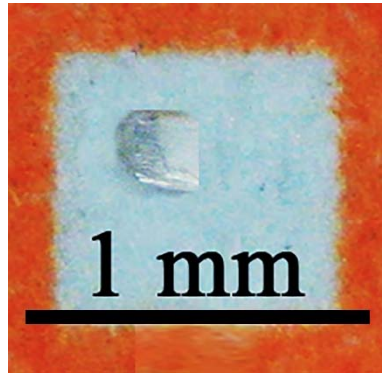

**Fig. S2.** Optical image of micrometer-sized single crystal  $\text{Li}_{11}\text{RbGd}_4\text{Te}_6\text{O}_{30}$ . The crystal is colorless and transparent in the visible light.

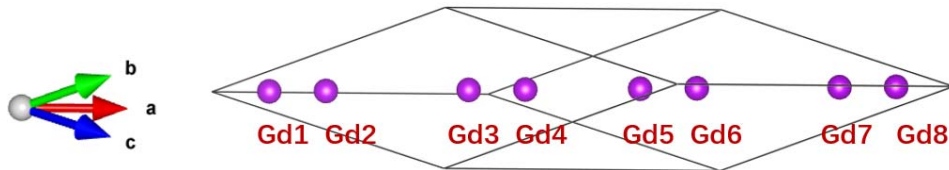

**Fig. S3.** Eight Gd ions in a primitive cell of  $\text{Li}_{11}\text{RbGd}_4\text{Te}_6\text{O}_{30}$ . Other ions are omitted. Please note that Gd1 and Gd2 form a dimer. But the distance between the Gd2 and Gd3 is longer than  $7 \text{ \AA}$ , which are not the nearest dimers. The nearest dimers (distance of about  $5.4 \text{ \AA}$ ) could only be shown in a conventional cell. Similarly, Gd4 and Gd5 (Gd6 and Gd7) are not the nearest dimers.
